# Supplementary material for: Investigation of Underlying Biological Association and Targets between Rejection of Renal Transplant and Renal Cancer
Source: Hindawi journal article supplement (doi:10.1155/2023/5542233), 2023-05-23

# Supplementary file

## Figure S1. The flow chart of whole study

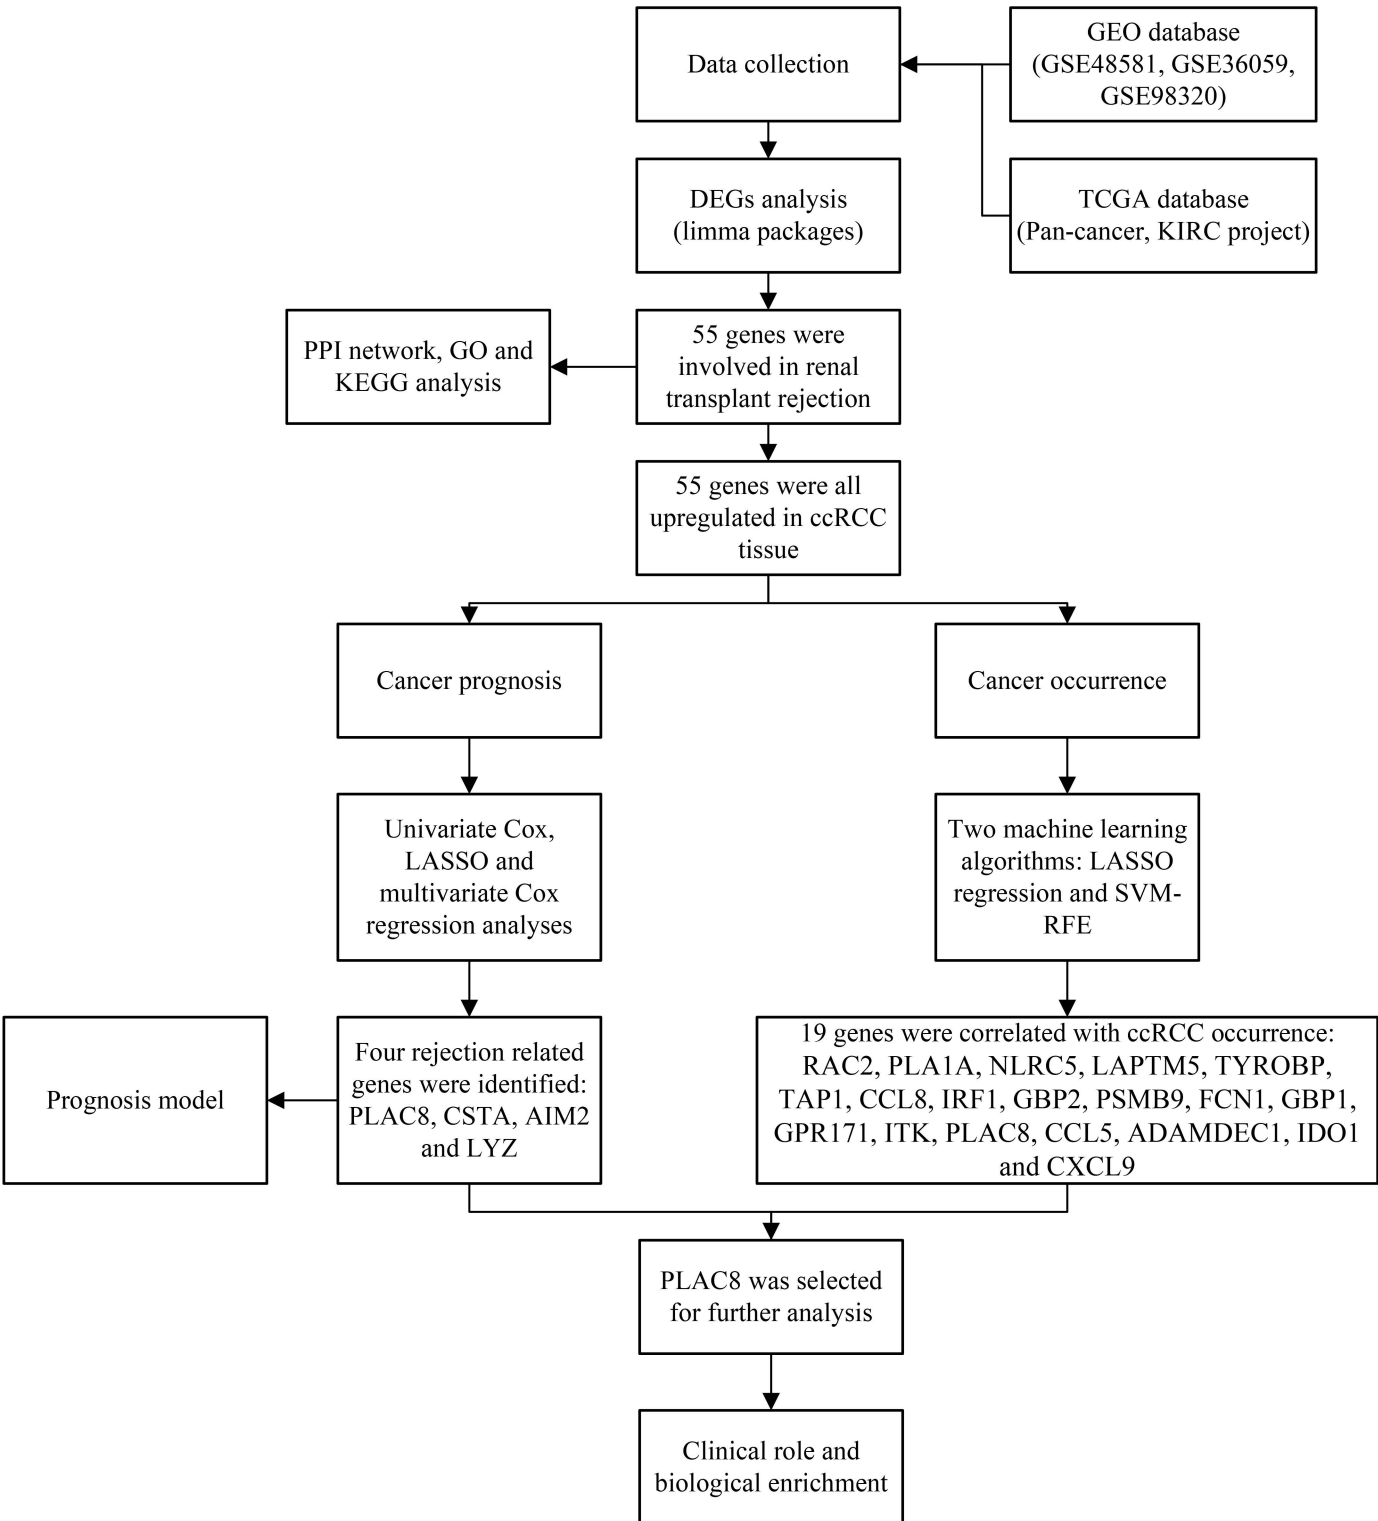

Supplement: f1 [file 5542233.f1.pdf]
